# Supplementary material
Source: ML conference proceedings conference paper supplement (https://proceedings.neurips.cc/paper_files/paper/2021/hash/4e0928de075538c593fbdabb0c5ef2c3-Abstract.html)
Supplement: Supplementary file [file 4e0928de075538c593fbdabb0c5ef2c3-Supplemental.pdf]

---

# Supplementary of “Twins: Revisiting the Design of Spatial Attention in Vision Transformer”

---

## A Experiment

Table 1 – Large models’ object detection performance on the COCO va12017 split using 1× schedule.

| Backbone             | RetinaNet 1× |             |                  |                  | Mask R-CNN 1× |          |                 |                 |
|----------------------|--------------|-------------|------------------|------------------|---------------|----------|-----------------|-----------------|
|                      | Param(M)     | AP          | AP <sub>50</sub> | AP <sub>75</sub> | FLOPs(G)      | Param(M) | AP <sup>b</sup> | AP <sup>m</sup> |
| ResNeXt101-64×4d [1] | 95.5         | 41.0        | 60.9             | 44.0             | 493           | 101.9    | 42.8            | 38.4            |
| PVT-Large [2]        | 71.1         | 42.6        | 63.7             | 45.4             | 364           | 81.0     | 42.9            | 39.5            |
| Twins-PCPVT-L (ours) | 71.2         | 45.1 (+4.1) | 66.4             | 48.4             | 364           | 81.2     | 45.4 (+2.6)     | 41.5            |
| Swin-B [3]           | 98.4         | 44.7        | 65.9             | 47.8             | 496           | 107.2    | 45.5            | 41.3            |
| Twins-SVT-L (ours)   | 110.9        | 45.7 (+4.7) | 67.1             | 49.2             | 474           | 119.7    | 45.9 (+3.1)     | 41.6            |

## B Algorithm

---

Algorithm 1 PyTorch snippet of LSA.

---

```
class GroupAttention(nn.Module):
    def __init__(self, dim, num_heads=8, qkv_bias=False, qk_scale=None, attn_drop=0., proj_drop=0., k1=7,
                 k2=7):
        super(GroupAttention, self).__init__()
        self.dim = dim
        self.num_heads = num_heads
        head_dim = dim // num_heads
        self.scale = qk_scale or head_dim ** -0.5
        self.qkv = nn.Linear(dim, dim * 3, bias=qkv_bias)
        self.attn_drop = nn.Dropout(attn_drop)
        self.proj = nn.Linear(dim, dim)
        self.proj_drop = nn.Dropout(proj_drop)
        self.k1 = k1
        self.k2 = k2

    def forward(self, x, H, W):
        B, N, C = x.shape
        h_group, w_group = H // self.k1, W // self.k2
        total_groups = h_group * w_group
        x = x.reshape(B, h_group, self.k1, w_group, self.k2, C).transpose(2, 3)
        qkv = self.qkv(x).reshape(B, total_groups, -1, 3, self.num_heads, C // self.num_heads).permute(3, 0,
        1, 4, 2, 5)
        q, k, v = qkv[0], qkv[1], qkv[2]
        attn = (q @ k.transpose(-2, -1)) * self.scale
        attn = attn.softmax(dim=-1)
        attn = self.attn_drop(attn)
        attn = (attn @ v).transpose(2, 3).reshape(B, h_group, w_group, self.k1, self.k2, C)
        x = attn.transpose(2, 3).reshape(B, N, C)
        x = self.proj(x)
        x = self.proj_drop(x)
        return x
```

---

**Table 2** – Configuration details of Twins-PCPVT.

|         | Output Size                        | Layer Name                   | Twins-PCPVT-S                                                          | Twins-PCPVT-B                                                           | Twins-PCPVT-L                                                           |
|---------|------------------------------------|------------------------------|------------------------------------------------------------------------|-------------------------------------------------------------------------|-------------------------------------------------------------------------|
| Stage 1 | $\frac{H}{4} \times \frac{W}{4}$   | Patch Embedding              | $P_1 = 4; C_1 = 64$                                                    |                                                                         |                                                                         |
|         |                                    | Transformer Encoder with PEG | $\begin{bmatrix} R_1 = 8 \\ N_1 = 1 \\ E_1 = 8 \end{bmatrix} \times 3$ | $\begin{bmatrix} R_1 = 8 \\ N_1 = 1 \\ E_1 = 8 \end{bmatrix} \times 3$  | $\begin{bmatrix} R_1 = 8 \\ N_1 = 1 \\ E_1 = 8 \end{bmatrix} \times 3$  |
| Stage 2 | $\frac{H}{8} \times \frac{W}{8}$   | Patch Embedding              | $P_2 = 2; C_2 = 128$                                                   |                                                                         |                                                                         |
|         |                                    | Transformer Encoder with PEG | $\begin{bmatrix} R_2 = 4 \\ N_2 = 2 \\ E_2 = 8 \end{bmatrix} \times 3$ | $\begin{bmatrix} R_2 = 4 \\ N_2 = 2 \\ E_2 = 8 \end{bmatrix} \times 3$  | $\begin{bmatrix} R_2 = 4 \\ N_2 = 2 \\ E_2 = 8 \end{bmatrix} \times 8$  |
| Stage 3 | $\frac{H}{16} \times \frac{W}{16}$ | Patch Embedding              | $P_3 = 2; C_3 = 320$                                                   |                                                                         |                                                                         |
|         |                                    | Transformer Encoder with PEG | $\begin{bmatrix} R_3 = 2 \\ N_3 = 5 \\ E_3 = 4 \end{bmatrix} \times 6$ | $\begin{bmatrix} R_3 = 2 \\ N_3 = 5 \\ E_3 = 4 \end{bmatrix} \times 18$ | $\begin{bmatrix} R_3 = 2 \\ N_3 = 5 \\ E_3 = 4 \end{bmatrix} \times 27$ |
| Stage 4 | $\frac{H}{32} \times \frac{W}{32}$ | Patch Embedding              | $P_4 = 2; C_4 = 512$                                                   |                                                                         |                                                                         |
|         |                                    | Transformer Encoder with PEG | $\begin{bmatrix} R_4 = 1 \\ N_4 = 8 \\ E_4 = 4 \end{bmatrix} \times 3$ | $\begin{bmatrix} R_4 = 1 \\ N_4 = 8 \\ E_4 = 4 \end{bmatrix} \times 3$  | $\begin{bmatrix} R_4 = 1 \\ N_4 = 8 \\ E_4 = 4 \end{bmatrix} \times 3$  |

**Table 3** – Configuration details of Twins-SVT.

|         | Output Size                        | Layer Name                 | Twins-SVT-S                                         | Twins-SVT-B                                         | Twins-SVT-L                                         |
|---------|------------------------------------|----------------------------|-----------------------------------------------------|-----------------------------------------------------|-----------------------------------------------------|
| Stage 1 | $\frac{H}{4} \times \frac{W}{4}$   | Patch Embedding            | $P_1 = 4; C_1 = 64$                                 | $P_1 = 4; C_1 = 96$                                 | $P_1 = 4; C_1 = 128$                                |
|         |                                    | Transformer Encoder w/ PEG | $\begin{bmatrix} LSA \\ GSA \end{bmatrix} \times 1$ | $\begin{bmatrix} LSA \\ GSA \end{bmatrix} \times 1$ | $\begin{bmatrix} LSA \\ GSA \end{bmatrix} \times 1$ |
| Stage 2 | $\frac{H}{8} \times \frac{W}{8}$   | Patch Embedding            | $P_2 = 2; C_2 = 128$                                | $P_2 = 2; C_2 = 192$                                | $P_2 = 2; C_2 = 256$                                |
|         |                                    | Transformer Encoder w/ PEG | $\begin{bmatrix} LSA \\ GSA \end{bmatrix} \times 1$ | $\begin{bmatrix} LSA \\ GSA \end{bmatrix} \times 1$ | $\begin{bmatrix} LSA \\ GSA \end{bmatrix} \times 1$ |
| Stage 3 | $\frac{H}{16} \times \frac{W}{16}$ | Patch Embedding            | $P_3 = 2; C_3 = 256$                                | $P_3 = 2; C_3 = 384$                                | $P_3 = 2; C_3 = 512$                                |
|         |                                    | Transformer Encoder w/ PEG | $\begin{bmatrix} LSA \\ GSA \end{bmatrix} \times 5$ | $\begin{bmatrix} LSA \\ GSA \end{bmatrix} \times 9$ | $\begin{bmatrix} LSA \\ GSA \end{bmatrix} \times 9$ |
| Stage 4 | $\frac{H}{32} \times \frac{W}{32}$ | Patch Embedding            | $P_4 = 2; C_4 = 512$                                | $P_4 = 2; C_4 = 768$                                | $P_4 = 2; C_4 = 1024$                               |
|         |                                    | Transformer Encoder w/ PEG | $[ GSA ] \times 4$                                  | $[ GSA ] \times 2$                                  | $[ GSA ] \times 2$                                  |

## C Architecture Setting

### References

- [1] Saining Xie, Ross Girshick, Piotr Dollár, Zhuowen Tu, and Kaiming He. Aggregated residual transformations for deep neural networks. In *Proc. IEEE Conf. Comp. Vis. Patt. Recogn.*, pages 1492–1500, 2017.
- [2] Wenhai Wang, Enze Xie, Xiang Li, Deng-Ping Fan, Kaitao Song, Ding Liang, Tong Lu, Ping Luo, and Ling Shao. Pyramid vision transformer: A versatile backbone for dense prediction without convolutions. *arXiv preprint arXiv:2102.12122*, 2021.
- [3] Ze Liu, Yutong Lin, Yue Cao, Han Hu, Yixuan Wei, Zheng Zhang, Stephen Lin, and Baining Guo. Swin transformer: Hierarchical vision transformer using shifted windows. *arXiv preprint arXiv:2103.14030*, 2021.
